# Supplementary material
Source: MDPI journal article supplement (https://www.mdpi.com/2071-1050/14/24/16576)
Supplement: s1 [file s1]

## **Supplementary Information**

### **Remediation of the alluvial aquifer of the Sardas landfill (Sabiñánigo, Huesca) by surfactant application**

Joaquín Guadaño<sup>(1)</sup>, Jorge Gómez<sup>(1)</sup>, Jesús Fernández<sup>(2)</sup>, David Lorenzo<sup>(3)</sup>, Carmen M. Domínguez<sup>(3)</sup>, Salvador Cotillas<sup>(3)</sup>, Raul García Cervilla<sup>(3)</sup>, Aurora Santos<sup>(3)\*</sup>

(1) EMGRISA: Empresa para la Gestión de Residuos Industriales, S.A., S.M.E., M.P. Madrid

(2) Dirección General de Cambio Climático y Educación Ambiental. Gobierno de Aragón. Zaragoza

(3) Chemical Engineering and Materials Department, Facultad de Ciencias Químicas, Universidad Complutense de Madrid. Ciudad Universitaria S/N, 28040 Madrid, Spain.

\* Corresponding author: aursan@quim.ucm.es

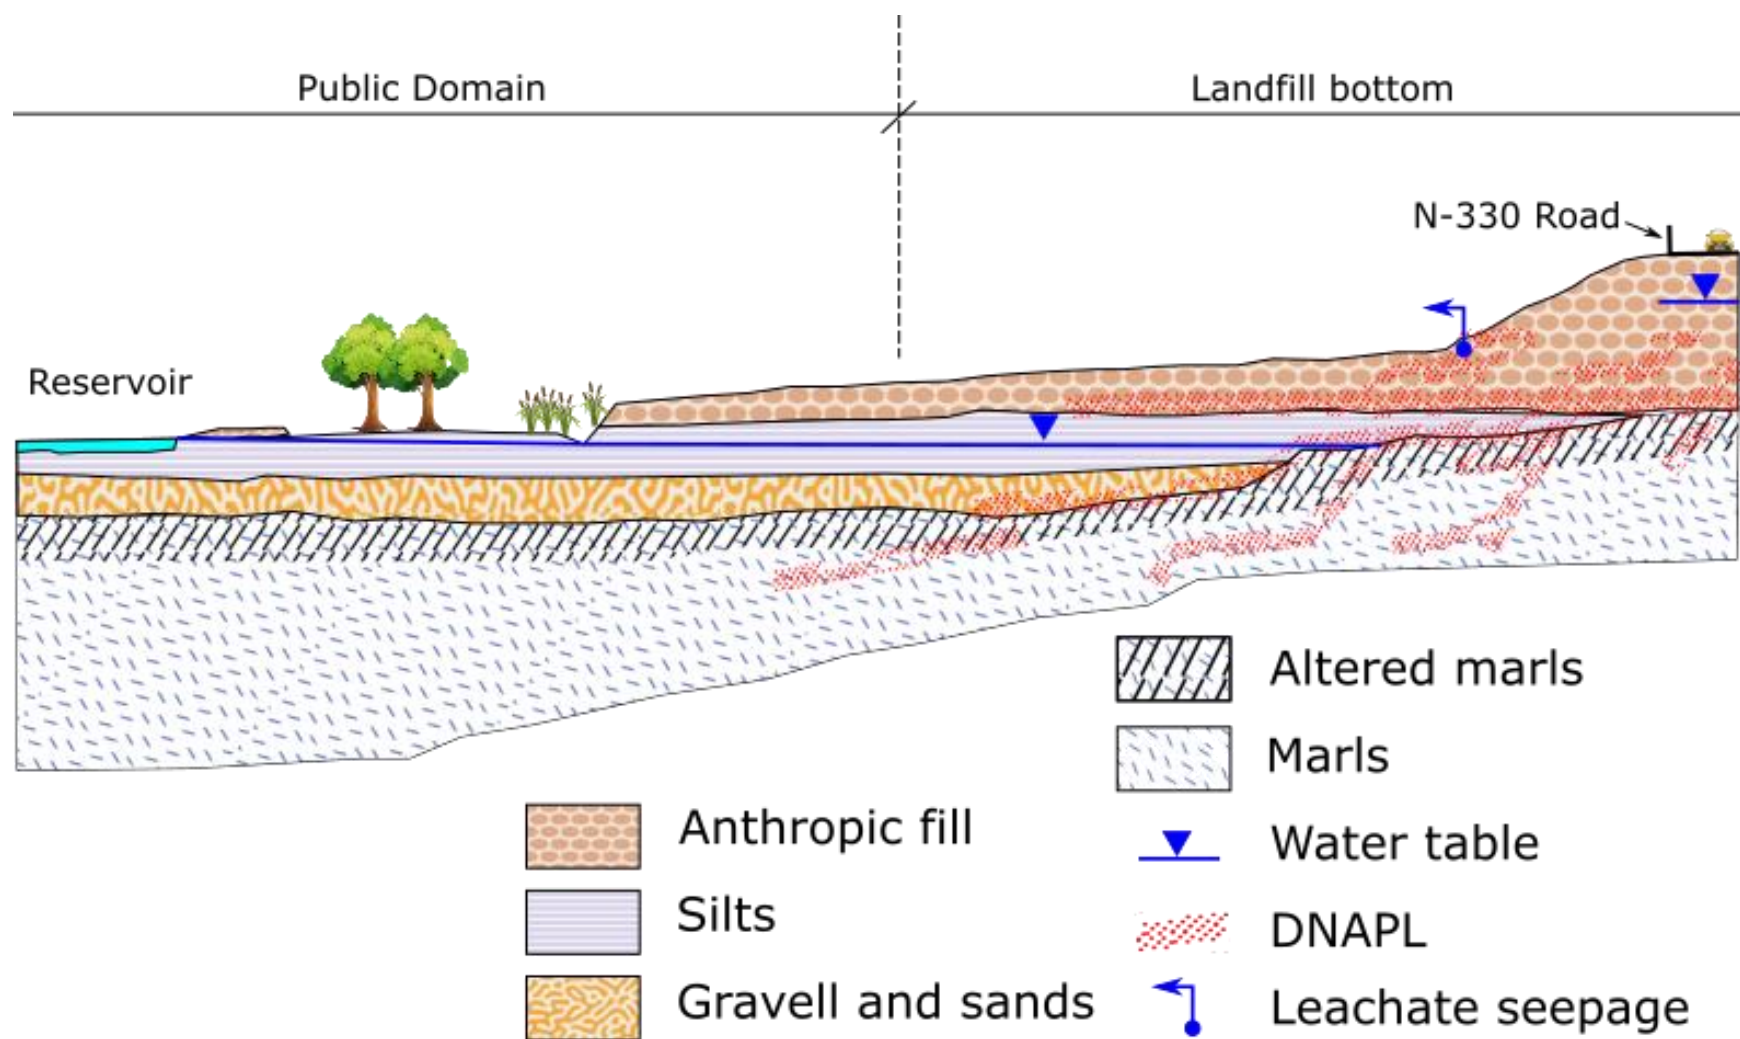

Figure S1. Conceptual model of the subsoil at Sardas landfill.

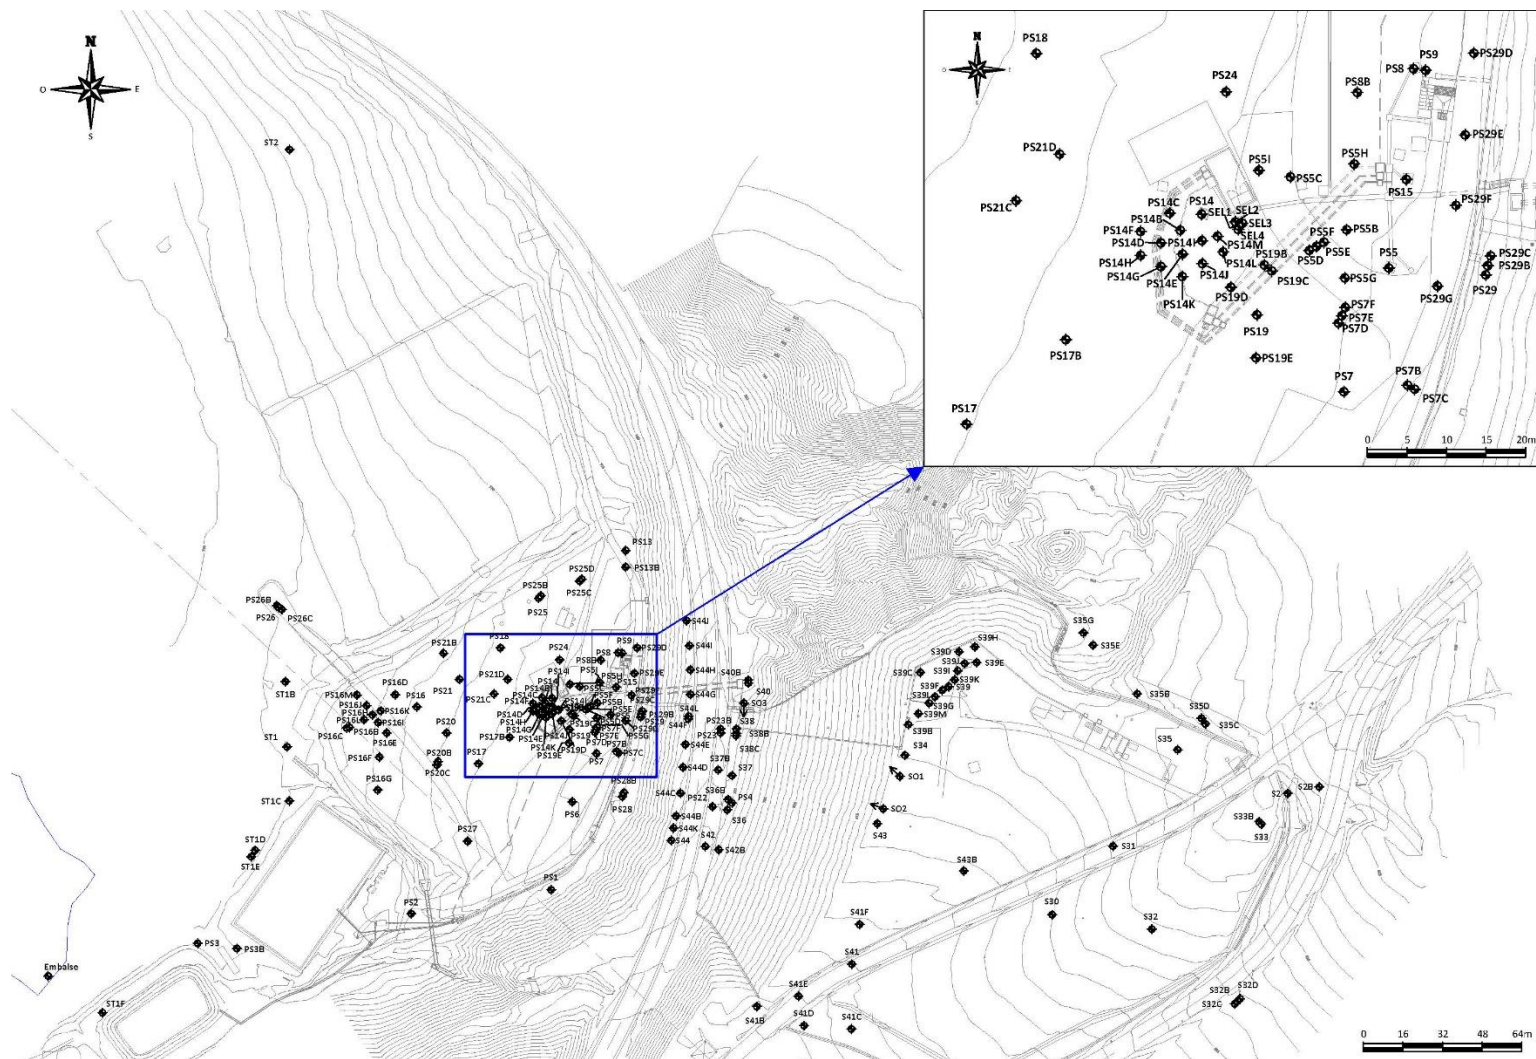

Figure S2. Complete map of wells in the Sardas Landfill

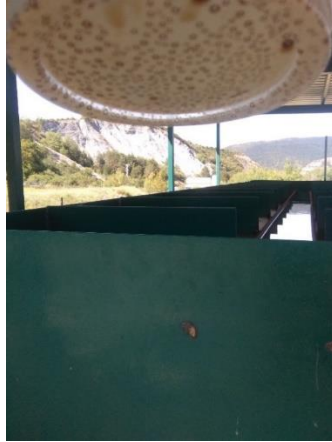

Figure S3. Appearance of GW samples taken at the end of the extraction in the injection event 1 and view of sedimentation tanks.

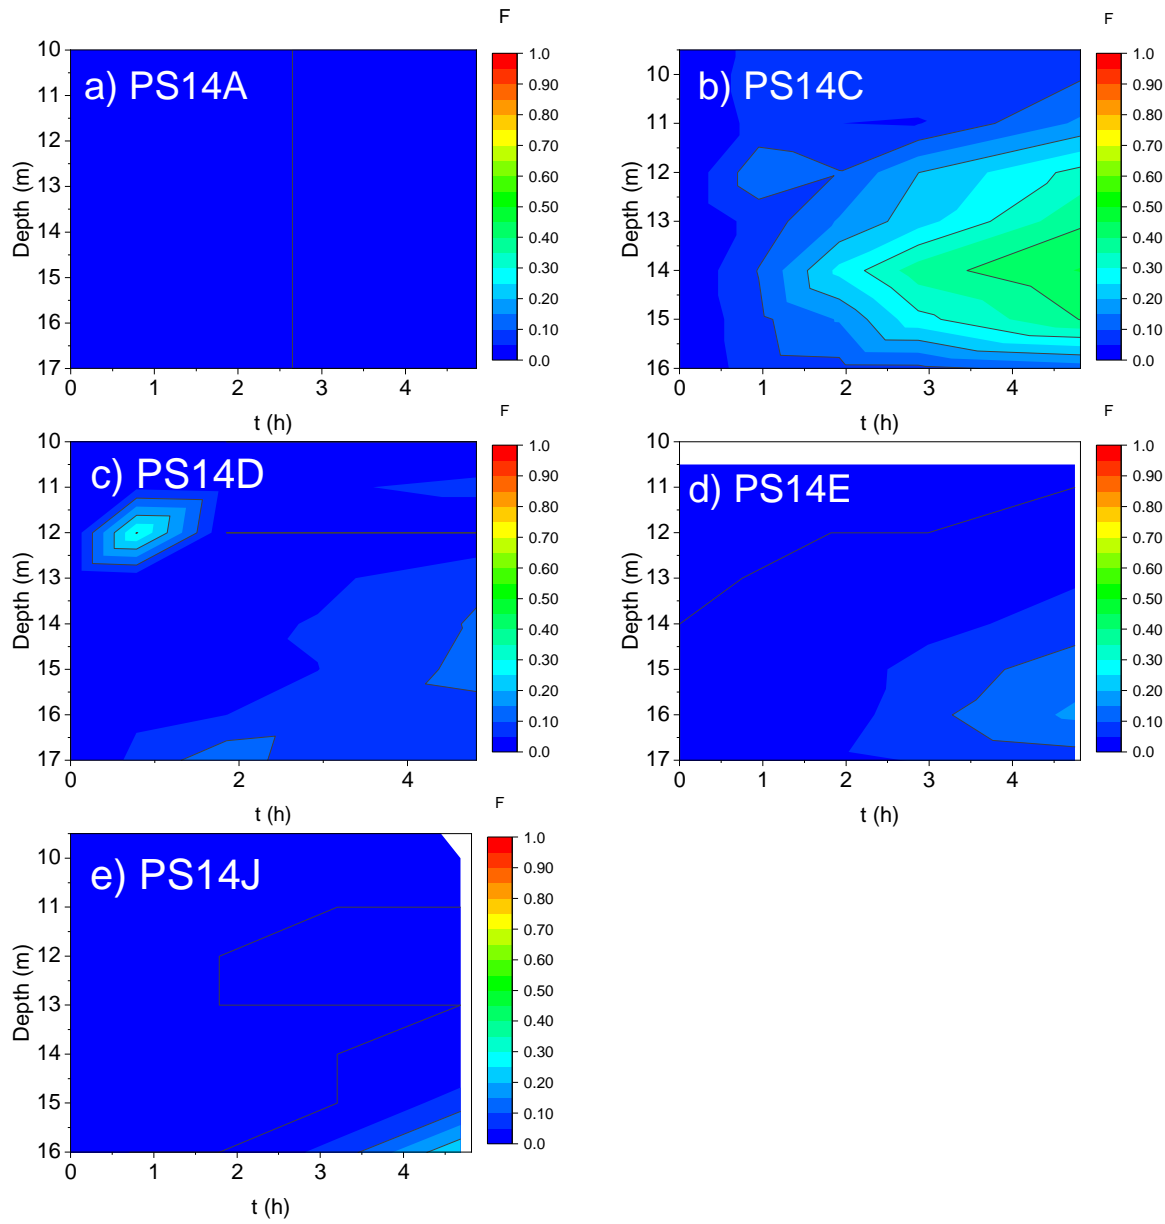

Figure S4. Dimensionless conductivity profiles ( $F_k$ , eq 3) with time and depth (m.s.n.s) in wells a)PS14A, b) PS14C, c)PS14D, d)PS14E and e) PS14J.

Table S1. Characteristics of the piezometers in the PS14s area. Reference elevations (msns) and depths (m).

| <b>Piezometers/<br/>injection<br/>well</b> | <b>Reference<br/>point</b> | <b>Bottom of<br/>piezometer</b> | <b>Top depth<br/>Gravels</b> | <b>Top depth<br/>Marls</b> | <b>Silt-gravel contact<br/>depth (ground<br/>level)</b> | <b>Depth of silt-gravel<br/>contact (piezometer<br/>mouth)</b> | <b>Gravel-loam contact<br/>depth (ground level)</b> | <b>Gravel-loam contact<br/>depth (piezometer<br/>mouth)</b> |
|--------------------------------------------|----------------------------|---------------------------------|------------------------------|----------------------------|---------------------------------------------------------|----------------------------------------------------------------|-----------------------------------------------------|-------------------------------------------------------------|
| <b>PS14</b>                                | 774.805                    | 756.155                         | 761.355                      | 758.455                    | 12.800                                                  | 13.45                                                          | 15.700                                              | 16.350                                                      |
| <b>PS14B</b>                               | 774.287                    | 757.467                         | 761.467                      | 758.467                    | 12.500                                                  | 12.82                                                          | 15.500                                              | 15.820                                                      |
| <b>PS14C</b>                               | 774.197                    | 757.637                         | 761.637                      | 758.537                    | 12.300                                                  | 12.56                                                          | 15.400                                              | 15.660                                                      |
| <b>PS14D</b>                               | 774.178                    | 757.058                         | 761.258                      | 757.858                    | 12.700                                                  | 12.92                                                          | 16.100                                              | 16.320                                                      |
| <b>PS14E</b>                               | 775.239                    | 757.109                         | 761.709                      | 758.109                    | 12.400                                                  | 13.53                                                          | 16.000                                              | 17.130                                                      |
| <b>PS14F</b>                               | 774.653                    | 756.863                         | 761.863                      | 758.363                    | 12.000                                                  | 12.79                                                          | 15.500                                              | 16.290                                                      |
| <b>PS14G</b>                               | 774.909                    | 757.569                         | 761.569                      | 758.569                    | 12.500                                                  | 13.34                                                          | 15.500                                              | 16.340                                                      |
| <b>PS14H</b>                               | 775.069                    | 756.959                         | 761.559                      | 758.459                    | 12.400                                                  | 13.51                                                          | 15.500                                              | 16.610                                                      |
| <b>PS14I</b>                               | 774.61                     | 757.33                          | 761.23                       | 758.43                     | 12.900                                                  | 13.38                                                          | 15.700                                              | 16.180                                                      |
| <b>PS14J</b>                               | 774.847                    | 757.607                         | 761.607                      | 758.307                    | 12.600                                                  | 13.24                                                          | 15.900                                              | 16.540                                                      |
| <b>PS14K</b>                               | 774.827                    | 757.657                         | 761.557                      | 758.457                    | 12.600                                                  | 13.27                                                          | 15.700                                              | 16.370                                                      |
| <b>PS14L</b>                               | 774.85                     | 757.58                          | 761.08                       | 758.38                     | 13.200                                                  | 13.77                                                          | 15.900                                              | 16.470                                                      |
| <b>PS14M</b>                               | 774.897                    | 757.627                         | 761.027                      | 758.527                    | 13.200                                                  | 13.87                                                          | 15.700                                              | 16.370                                                      |
| <b>PS5C</b>                                | 774.414                    | 758.214                         | 761.114                      | 759.014                    | 13.300                                                  | 13.30                                                          | 15.400                                              | 15.400                                                      |
| <b>PS5D</b>                                | 774.556                    | 758.056                         | 760.856                      | 759.256                    | 13.700                                                  | 13.70                                                          | 15.300                                              | 15.300                                                      |
| <b>PS19B</b>                               | 774.561                    | 758.432                         | 760.432                      | 759.032                    | 13.900                                                  | 14.13                                                          | 15.300                                              | 15.529                                                      |
| <b>PS19D</b>                               | 775.075                    | 758.32                          | 761.32                       | 758.82                     | 12.900                                                  | 13.76                                                          | 15.400                                              | 16.255                                                      |
| <b>PS21C</b>                               | 773.674                    | 757.189                         | 761.889                      | 758.089                    | 11.000                                                  | 11.79                                                          | 14.800                                              | 15.585                                                      |
| <b>PS21D</b>                               | 773.806                    | 758.001                         | 761.901                      | 758.801                    | 11.100                                                  | 11.91                                                          | 14.200                                              | 15.005                                                      |

Table S2. DNAPL Composition.

| COMPOUND                                                   |                                    | M (g/mol)                                                                            | C (mg/kg) | %w   |
|------------------------------------------------------------|------------------------------------|--------------------------------------------------------------------------------------|-----------|------|
| Name                                                       | Acronym                            |                                                                                      |           |      |
| Chlorobenzene                                              | CB                                 | 112.5                                                                                | 96610.1   | 10.0 |
| 1,3 -dichlorobenzene                                       | 1,3-DCB                            | 147.0                                                                                | 5954.1    | 0.6  |
| 1,4 -dichlorobenzene                                       | 1,4-DCB                            | 147.0                                                                                | 54140.5   | 5.6  |
| 1,2 -dichlorobenzene                                       | 1,2-DCB                            | 147.0                                                                                | 43743.0   | 4.5  |
| 1,3,5 trichlorobenzene                                     | 1,3,5-TCB                          | 181.5                                                                                | 1812.8    | 0.2  |
| 1,2,4 trichlorobenzene                                     | 1,2,4-TCB                          | 181.5                                                                                | 129035.3  | 13.4 |
| 1,2,3 trichlorobenzene                                     | 1,2,3-TCB                          | 181.5                                                                                | 20061.7   | 2.1  |
| 1,2,4,5-tetrachlorobenzene /<br>1,2,3,5-tetrachlorobenzene | TetraCBa<br>(1,2,4,5 +<br>1,2,3,5) | 216.0                                                                                | 52347.6   | 5.4  |
| 1,2,3,4-tetrachlorobenzene                                 | TetraCBb<br>(1,2,3,4)              | 216.0                                                                                | 72957.8   | 7.6  |
| $\gamma$ -Pentachlorocyclohexene                           | $\gamma$ -PentaCX                  | 254.0                                                                                | 21236.8   | 2.2  |
| 1,2,3,4,5 Pentachlorobenzene                               | PCB                                | 250.0                                                                                | 5642.4    | 0.6  |
| $\delta$ -Pentachlorocyclohexene .                         | $\delta$ -PentaCX                  | 254.0                                                                                | 19435.2   | 2.0  |
| $\theta$ -Pentachlorocyclohexene .                         | $\theta$ -PentaCX                  | 254.0                                                                                | 1548.0    | 0.2  |
| Hexachlorocyclohexene                                      | HexaCX-a                           | 289.0                                                                                | 6762.4    | 0.7  |
| $\beta$ -Pentachlorocyclohexene .                          | $\beta$ -PentaCX                   | 254.0                                                                                | 2612.6    | 0.3  |
| $\eta$ -Pentachlorocyclohexene                             | $\eta$ -Penta CX                   | 254.0                                                                                | 1612.2    | 0.2  |
| Hexachlorocyclohexene                                      | HexaCX-b                           | 289.0                                                                                | 2375.3    | 0.2  |
| Hexachlorocyclohexene                                      | HexaCX-c                           | 289.0                                                                                | 7274.5    | 0.8  |
| $\alpha$ -Hexachlorocyclohexane                            | $\alpha$ -HCH                      | 291.0                                                                                | 38295.0   | 4.0  |
| Hexachlorocyclohexene                                      | HexaCX-d                           | 289.0                                                                                | 16.8      | 0.0  |
| $\beta$ -hexachlorocyclohexane .                           | $\beta$ -HCH                       | 291.0                                                                                | 0.4       | 0.0  |
| $\gamma$ -Hexachlorocyclohexane<br>(Lindane)               | $\gamma$ -HCH                      | 291.0                                                                                | 126985.3  | 13.2 |
| Heptachlorocyclohexane                                     | HeptaCH-1                          | 325.0                                                                                | 106325.6  | 11.0 |
| $\delta$ -Hexachlorocyclohexane .                          | $\delta$ -HCH                      | 291.0                                                                                | 71041.2   | 7.4  |
| $\epsilon$ -Hexachlorocyclohexane                          | $\epsilon$ -HCH                    | 291.0                                                                                | 16327.8   | 1.7  |
| Heptachlorocyclohexane                                     | HeptaCH-2                          | 325.0                                                                                | 40659.8   | 4.2  |
| Heptachlorocyclohexane                                     | HeptaCH-3                          | 325.0                                                                                | 19245.1   | 2.0  |
| DNAPL from PS14D look                                      |                                    |  |           |      |

Table S3. Groundwater monitoring during injection (event 1).

| WELL  | Time (h) * | C surf (g/L) | COCs tot (mg/L) | CBs +DCBS (mg/L) | TCBs+TetraCBS (mg/L) | Sum of NAC (mg/L) | C Br (mg/L) | k (microS/cm) | F Br | F surf |
|-------|------------|--------------|-----------------|------------------|----------------------|-------------------|-------------|---------------|------|--------|
| PS14  | 0          | 0.0          | 4.6             | 26.506           | 16.452               | 5.484             | 0.0         | 5527          | 0    | 0      |
| PS14  | 8          | 2.6          | 255.0           | 255.03           | 43.66                | 62                | 31.2        | 4380          | 0.12 | 0.13   |
| PS14  | 24         | 1.3          | 312.9           | 312.92           | 38.18                | 80.6              | 93.6        | 4324          | 0.36 | 0.06   |
| PS14B | 0          | 0.0          | 3.0             | 17.32            | 11.1                 | 3.2               | 0.0         | 5771          | 0    | 0      |
| PS14B | 8          | 22.3         | 491.6           | 491.61           | 70.93                | 123.4             | 205.4       | 847           | 0.79 | 1.11   |
| PS14B | 24         | 4.7          | 1005.3          | 1005.3           | 118.7                | 260.1             | 234.0       | 2613          | 0.9  | 0.23   |
| PS14C | 0          | 0.0          | 4.2             | 21.26            | 12                   | 5.1               | 0.0         | 5780          | 0    | 0      |
| PS14C | 8          | 12.3         | 1821.8          | 1821.82          | 256.16               | 459.3             | 161.2       | 2433          | 0.62 | 0.61   |
| PS14C | 24         | 6.9          | 2241.7          | 2241.76          | 312.71               | 565.9             | 223.6       | 2801          | 0.86 | 0.35   |
| PS14D | 0          | 0.0          | 3.1             | 19.5             | 13                   | 3.4               | 0.0         | 6397          | 0    | 0      |
| PS14D | 8          | 3.0          | 705.6           | 705.5            | 109.6                | 174.8             | 67.6        | 4996          | 0.26 | 0.15   |
| PS14D | 24         | 0.8          | 230.2           | 230.3            | 46.2                 | 54                | 54.6        | 6014          | 0.21 | 0.04   |
| PS14E | 0          | 0.0          | 4.0             | 21               | 12                   | 5                 | 0.0         | 6107          | 0    | 0      |
| PS14E | 8          | 21.7         | 791.3           | 791.2            | 111.4                | 199.4             | 265.2       | 1030          | 1.02 | 1.08   |
| PS14E | 24         | 2.0          | 339.8           | 339.8            | 51.5                 | 84.6              | 117.0       | 3350          | 0.45 | 0.1    |
| PS14F | 0          | 0.0          | 3.8             | 19.9             | 12                   | 4.1               | 0.0         | 5144          | 0    | 0      |
| PS14F | 8          | 0.0          | 15.4            | 15.4             | 8.6                  | 0                 | 0.0         | 5223          | 0    | 0      |
| PS14F | 24         | 0.0          | 7.3             | 7.3              | 0                    | 0                 | 0.0         | 5107          | 0    | 0      |
| PS14G | 0          | 0.0          | 2.3             | 13.4             | 8                    | 3.1               | 0.0         | 5217          | 0    | 0      |
| PS14G | 8          | 4.7          | 114.9           | 114.9            | 19.8                 | 27.9              | 83.2        | 3669          | 0.32 | 0.24   |
| PS14G | 24         | 0.9          | 64.8            | 64.7             | 15.7                 | 14.4              | 18.2        | 4309          | 0.07 | 0.05   |
| PS14H | 0          | 0.0          | 2.2             | 13.8             | 9.1                  | 2.5               | 0.0         | 5434          | 0    | 0      |
| PS14H | 8          | 1.0          | 110.6           | 110.5            | 27.6                 | 24.3              | 0.0         | 5037          | 0    | 0.05   |
| PS14H | 24         | 0.4          | 52.2            | 52.3             | 14.1                 | 11.2              | 15.6        | 5018          | 0.06 | 0.02   |
| PS14I | 0          | 0.0          | 3.5             | 20.2             | 12.9                 | 3.8               | 0.0         | 5193          | 0    | 0      |
| PS14I | 8          | 20.6         | 610.0           | 609.9            | 87.2                 | 153.3             | 286.0       | 780           | 1.10 | 1.03   |
| PS14I | 24         | 5.6          | 710.7           | 710.7            | 88.7                 | 182.5             | 247.0       | 2185          | 0.95 | 0.28   |



| WELL  | Time<br>(h) * | C surf<br>(g/L) | COCs tot<br>(mg/L) | CBs +DCBS<br>(mg/L) | TCBs+TetraCBS<br>(mg/L) | Sum of NAC<br>(mg/L) | C Br<br>(mg/L) | k<br>(microS/cm) | F <sub>Br</sub> | F <sub>surf</sub> |
|-------|---------------|-----------------|--------------------|---------------------|-------------------------|----------------------|----------------|------------------|-----------------|-------------------|
| PS14J | 0             | 0               | 21.2               | 14                  | 3.8                     | 3.4                  | 0              | 6394             | 0               | 0                 |
| PS14J | 8             | 0.27            | 8.2                | 0.7                 | 0                       | 7.5                  | 0              | 6028             | 0               | 0.01              |
| PS14J | 24            | 0               | 3                  | 0                   | 0                       | 3                    | 0              | 5777             | 0               | 0                 |
| PS14K | 0             | 0               | 13.7               | 9                   | 2.4                     | 2.3                  | 0              | 5504             | 0               | 0                 |
| PS14K | 8             | 0.75            | 4.6                | 0.4                 | 0                       | 4.2                  | 88.4           | 3688             | 0.34            | 0.04              |
| PS14K | 24            | 3.8             | 95.8               | 26                  | 20.5                    | 49.3                 | 122.2          | 3531             | 0.47            | 0.19              |
| PS14L | 0             | 0               | 9.8                | 6                   | 2.1                     | 1.7                  | 0              | 5982             | 0               | 0                 |
| PS14L | 8             | 0               | 2.5                | 0                   | 0                       | 2.5                  | 0              | 5787             | 0               | 0                 |
| PS14L | 24            | 0               | 2.4                | 0                   | 0                       | 2.4                  | 0              | 5826             | 0               | 0                 |
| PS14M | 0             | 0               | 17.5               | 10.2                | 3.9                     | 3.4                  | 0              | 5155             | 0               | 0                 |
| PS14M | 8             | 19.45           | 769.2              | 91.2                | 198.9                   | 479.1                | 267.8          | 1705             | 1.03            | 0.97              |
| PS14M | 24            | 3.86            | 270.6              | 48.4                | 65.2                    | 157                  | 114.4          | 3481             | 0.44            | 0.19              |
| PS21C | 0             | 0               | 14.7               | 9.2                 | 3.1                     | 2.4                  | 0              | 3061             | 0               | 0                 |
| PS21C | 8             | 0               | 2.5                | 0                   | 0                       | 2.5                  | 0              | 2874             | 0               | 0                 |

Table S4. Groundwater monitoring in injection event 6.

| WELL  | Time (h)<br>* | C surf<br>(g/L) | COCs tot<br>(mg/L) | CBs +DCBS<br>(mg/L) | TCBs+TetraCBS<br>(mg/L) | Sum of NAC<br>(mg/L) | C Br<br>(mg/L) | k<br>(microS/cm) | F <sub>Br</sub> | F <sub>surf</sub> |
|-------|---------------|-----------------|--------------------|---------------------|-------------------------|----------------------|----------------|------------------|-----------------|-------------------|
| PS14A | 0             | 0               | 26.69              | 16.61               | 5.58                    | 4.49                 | 0              | 6571             | 0               | 0                 |
| PS14A | 5.65          | 0               | 26.3               | 18.91               | 4.37                    | 3.03                 | 0              | 6372             | 0               | 0                 |
| PS14B | 0             | 0               | 23.4               | 16.66               | 3.31                    | 3.44                 | 17.7           | 6375             | 0.03            | 0                 |
| PS14B | 5.63          | 26.15           | 40.79              | 9.36                | 18.86                   | 12.57                | 539.96         | 1664             | 1               | 0.9               |
| PS14C | 0             | 0               | 29.25              | 20.72               | 4.08                    | 4.45                 | 6.54           | 6890             | 0.01            | 0                 |
| PS14C | 5.66          | 0.16            | 53.84              | 24.55               | 13.64                   | 15.65                | 39.36          | 6152             | 0.07            | 0.01              |
| PS14D | 0             | 0               | 37.21              | 27.01               | 4.81                    | 5.39                 | 12.92          | 7189             | 0.02            | 0                 |
| PS14D | 5.7           | 0.17            | 40.17              | 21.82               | 10.29                   | 8.05                 | 16.33          | 6695             | 0.03            | 0.01              |
| PS14E | 0             | 0.01            | 23.78              | 18.41               | 3.09                    | 2.28                 | 12.28          | 7126             | 0.02            | 0                 |
| PS14E | 5.7           | 0.98            | 57.61              | 27.91               | 17.45                   | 12.25                | 44.27          | 6661             | 0.08            | 0.03              |
| PS14J | 0             | 0               | 26.08              | 15.5                | 4.4                     | 6.18                 | -11.32         | 6600             | 0               | 0                 |
| PS14J | 5.73          | 23.62           | 133.81             | 35.18               | 47.95                   | 50.68                | 533.23         | 1995             | 0.99            | 0.81              |
| PS14K | 0             | 0               | 7.66               | 6.77                | 0.57                    | 0.3                  | 5.22           | 6960             | 0.01            | 0                 |
| PS14K | 5.73          |                 |                    |                     |                         |                      | 46.71          | 5892             | 0.09            |                   |
| PS14L | 0             | 0               | 17.97              | 12.7                | 2.3                     | 2.98                 | -2.56          | 7271             | 0               | 0                 |
| PS14L | 5.73          | 0               | 20.45              | 12.76               | 3.48                    | 4.21                 | 3.6            | 7019             | 0.01            | 0                 |
| PS14M | 0             | 0.01            | 18.85              | 14.85               | 2.37                    | 1.61                 |                | 5806             | 0.02            | 0                 |
| PS14M | 5.8           | 14.36           | 47.86              | 18.36               | 18.64                   | 10.85                | 317.2          | 3612             | 0.59            | 0.5               |
| PS14I | 0             | 0.01            | 25.1               | 16.58               | 3.81                    | 4.71                 | -0.44          | 5724             | 0               | 0                 |
| PS14I | 1.5           | 4.09            | 30.46              | 18.23               | 7.83                    | 4.39                 | 163.85         | 5536             | 0.3             | 0.14              |
| PS14I | 2.37          | 9.63            | 49.02              | 26.55               | 14.5                    | 7.96                 | 339.06         | 4764             | 0.63            | 0.33              |
| PS14I | 3.5           | 12.1            | 19.75              | 6.79                | 6.72                    | 6.23                 | 284.54         | 4040             | 0.53            | 0.40              |
| PS14I | 5.73          | 13.77           | 90.58              | 39.89               | 30.41                   | 20.27                | 235.83         | 4340             | 0.44            | 0.47              |
| PS14I | 24.07         | 1.55            | 52.4               | 19.62               | 19.13                   | 13.65                | 94.61          | 4621             | 0.18            | 0.05              |
| PS14I | 43.67         | 1.52            | 68.13              | 24.73               | 24.6                    | 18.8                 | 131.52         | 4380             | 0.24            | 0.05              |
| PS14I | 43.83         | 1.5             | 60.49              | 26.7                | 20.25                   | 13.55                | 131.27         | 4538             | 0.24            | 0.05              |
| PS14I | 44.33         | 1.5             | 57.82              | 25.32               | 19.97                   | 12.52                | 129.18         | 4550             | 0.24            | 0.05              |
| PS14I | 44.83         | 1.48            | 55.36              | 26.95               | 18.62                   | 9.77                 | 127.3          | 4783             | 0.24            | 0.05              |
| PS14I | 45.33         | 0.65            | 52.06              | 25.6                | 17.37                   | 9.07                 | 127.82         | 4962             | 0.24            | 0.05              |
| PS14I | 46.33         | 0.26            | 35.16              | 18.34               | 11.23                   | 5.6                  | 76.52          | 5116             | 0.14            | 0.02              |
| PS14I | 47.33         | 0.14            | 23.23              | 15.15               | 5.59                    | 2.49                 | 46.07          | 5075             | 0.09            | 0.01              |
| PS14I | 48.33         | 1.55            | 17.46              | 12.14               | 3.82                    | 1.48                 | 63.25          | 5042             | 0.12            | 0                 |
